# Supplementary material for: Characterization of Antibiotic Treatment among Children Aged 0–59 Months Hospitalized for Acute Bacterial Gastroenteritis in Israel
Source: MDPI journal article supplement (doi:10.3390/antibiotics13010064), 2024-01-08
Supplement: s1 [file s1]

**Table S1: Results of complete blood count and biochemistry tests of participants aged 0-59 months hospitalized with bacterial AGE or bacterial co-bacterial infections.**

| Tests                      | N   | Min   | Max   | Median | IQR  | Mean  | SD    |
|----------------------------|-----|-------|-------|--------|------|-------|-------|
| Hemoglobin (g/dl)          | 800 | 7.1   | 18.9  | 11.3   | 1.5  | 11.4  | 1.3   |
| Platelets (K/ $\mu$ l)     | 798 | 19.0* | 872.0 | 357.0  | 148  | 368.8 | 123.8 |
| Leukocytes (K/ $\mu$ l)    | 799 | 2.4   | 43.8  | 13.5   | 8.8  | 14.8  | 6.7   |
| Neutrophils (K/ $\mu$ l)   | 797 | 0.7   | 86.1  | 7.4    | 7.7  | 8.7   | 6.4   |
| Lymphocytes (K/ $\mu$ l)   | 797 | 0.4   | 44.7  | 4.2    | 3.4  | 4.7   | 3.2   |
| Glucose (mg/dL)            | 789 | 32.0  | 206.0 | 95.0   | 23.0 | 96.9  | 21.5  |
| Blood urea nitrogen, mg/dL | 794 | 1.6   | 55.7  | 9.3    | 5.9  | 10.4  | 5.2   |
| Creatinine (mg/dL)         | 773 | 0.04  | 1.5   | 0.3    | 0.1  | 0.3   | 0.1   |
| C-reactive protein (mg/L)  | 796 | 0.0   | 369.0 | 32.8   | 72.3 | 56.5  | 64.3  |
| Sodium mEq/l               | 759 | 121.1 | 189.5 | 137.0  | 4.0  | 137.1 | 3.7   |
| Potassium mEq/l            | 729 | 2.9   | 7.2   | 4.6    | 0.8  | 4.6   | 0.6   |

IQR= Interquartile range; Max= Maximum; Min= Minimum; SD=Standard deviation.

\*One child had thrombocytopenia with 19.0 (K/ $\mu$ l) platelets, other values are above > 94 (K/ $\mu$ l).

**Table S2: Antibiotic agents prescribed for children hospitalized with culture-proven bacterial AGE or dysentery without any other bacterial co-infection (n=518) overall and by timing relative to hospital admission**

|                                      | <b>Antibiotics treatment (any)</b> | <b>Before admission</b> | <b>During hospitalization</b> | <b>At discharge</b> |
|--------------------------------------|------------------------------------|-------------------------|-------------------------------|---------------------|
|                                      | <b>N (%)</b>                       | <b>N (%)</b>            | <b>N (%)</b>                  | <b>N (%)</b>        |
| <b>Received antibiotic</b>           |                                    |                         |                               |                     |
| Yes                                  | 338/518 (65.3%)                    | 37/338 (10.9%)          | 310/338 (91.7%)               | 153/338 (45.3%)     |
| No                                   | 180/518 (34.7%)                    | NA                      | NA                            | NA                  |
| <b>Antibiotic agents<sup>§</sup></b> |                                    |                         |                               |                     |
| <b>Penicillin</b>                    |                                    |                         |                               |                     |
| Ampicillin                           | 6/338 (1.8%)                       | 0/37 (0.0%)             | 6/310 (1.9%)                  | 0/153 (0.0%)        |
| Amoxicillin                          | 22/338 (6.5%)                      | 13/37 (35.1%)           | 4/310 (1.3%)                  | 8/153 (5.2%)        |
| Penicillin V                         | 1/338 (0.3%)                       | 1/37 (2.7%)             | 0/310 (0.0%)                  | 0/153 (0.0%)        |
| Amoxicillin/clavulanic acid          | 5/338 (1.5%)                       | 2/37 (5.4%)             | 2/310 (0.6%)                  | 0/153 (0.0%)        |
| <b>Cephalosporins 1st generation</b> |                                    |                         |                               |                     |
| Cephalexin                           | 7/338 (2.1%)                       | 0/37 (0.0%)             | 3/310 (1.0%)                  | 5/153 (3.3%)        |
| <b>Cephalosporins 2nd generation</b> |                                    |                         |                               |                     |
| Cefuroxime                           | 4/338 (1.2%)                       | 0/37 (0.0%)             | 4/310 (1.3%)                  | 0/153 (0.0%)        |
| <b>Cephalosporins 3rd generation</b> |                                    |                         |                               |                     |
| Ceftriaxone                          | 125/338 (37.0%)                    | 3/37 (8.1%)             | 122/310 (39.4%)               | 0/153 (0.0%)        |
| Ceftazidime                          | 1/338 (0.3%)                       | 0/37 (0.0%)             | 1/310 (0.3%)                  | 0/153 (0.0%)        |
| Cefotaxime                           | 1/338 (0.3%)                       | 0/37 (0.0%)             | 0/310 (0.0%)                  | 0/153 (0.0%)        |
| <b>Macrolides</b>                    |                                    |                         |                               |                     |
| Azithromycin                         | 221/338 (65.4%)                    | 20/37 (54.1%)           | 190/310 (61.3%)               | 140/153 (91.5%)     |
| <b>Other antibiotics</b>             |                                    |                         |                               |                     |
| Gentamicin                           | 5/338 (1.5%)                       | 0/37 (0.0%)             | 5/310 (1.6%)                  | 0/153 (0.0%)        |
| Metronidazole                        | 6/338 (1.8%)                       | 0/37 (0.0%)             | 6/310 (1.9%)                  | 2/153 (1.3%)        |
| Trimethoprim/sulfamethoxazole        | 3/338 (0.9%)                       | 2/37 (5.4%)             | 0/310 (0.0%)                  | 1/153 (0.7%)        |
| Vancomycin                           | 1/338 (0.3%)                       | 0/37 (0.0%)             | 1/310 (0.3%)                  | 0/153 (0.0%)        |
| <b>Unknown*</b>                      | 11/338 (3.3%)                      | 0/37 (0.0%)             | 11/310 (3.5%)                 | 0/153 (0.0%)        |

<sup>§</sup> Some children received more than one antibiotic agent; therefore, the percentages exceed 100%. \* Antibiotic treatment documented without specifying the particular agent used. AGE= Acute gastroenteritis. NA: not applicable; percentages calculated among those who received antibiotics

**Table S3: Antibiotic treatment during or after hospitalization in children with culture-proven bacterial AGE, overall and by sub-groups**

|                                      | <b>Culture-proven bacterial AGE</b> | <i>Campylobacter</i> | <i>Shigella</i> | <i>Salmonella</i> | <b>Mixed infections*</b> | <b>Overall, positive stool culture</b> | <b>Overall dysentery</b> | <b>Only dysentery without a positive stool</b> |
|--------------------------------------|-------------------------------------|----------------------|-----------------|-------------------|--------------------------|----------------------------------------|--------------------------|------------------------------------------------|
|                                      | <b>N (%)</b>                        | <b>N (%)</b>         | <b>N (%)</b>    | <b>N (%)</b>      | <b>N (%)</b>             | <b>N (%)</b>                           | <b>N (%)</b>             | <b>N (%)</b>                                   |
| <b>Total</b>                         | 518                                 | 230                  | 62              | 55                | 7                        | 354                                    | 329                      | 154                                            |
| <b>Received antibiotics</b>          |                                     |                      |                 |                   |                          |                                        |                          |                                                |
| Yes                                  | 324/518 (62.5%)                     | 150/230 (65.2%)      | 40/62 (64.5%)   | 26/55 (47.3%)     | 7/7 (100%)               | 223/354 (63.0%)                        | 246/329 (74.8%)          | 92/154 (59.7%)                                 |
| No                                   | 194/518 (37.5%)                     | 80/230 (34.8%)       | 22/62 (35.5%)   | 29/55 (52.7%)     | 0/7 (0.0%)               | 131/354 (37.0%)                        | 83/329 (25.2%)           | 62/154 (40.3%)                                 |
| <b>Antibiotic agents<sup>§</sup></b> |                                     |                      |                 |                   |                          |                                        |                          |                                                |
| <b>Penicillin</b>                    |                                     |                      |                 |                   |                          |                                        |                          |                                                |
| Ampicillin                           | 6/324 (1.9%)                        | 2/150 (1.3%)         | 1/40 (2.5%)     | 1/26 (3.8%)       | 0/7 (0.0%)               | 4/223 (1.8%)                           | 4/246 (1.6%)             | 2/92 (2.2%)                                    |
| Amoxicillin                          | 10/324 (3.1%)                       | 4/150 (2.7%)         | 2/40 (5.0%)     | 0/26 (0.0%)       | 1/7 (14.3%)              | 7/223 (3.1%)                           | 6/246 (2.4%)             | 1/92 (1.1%)                                    |
| Amoxicillin/<br>clavulanic acid      | 3/324 (0.9%)                        | 1/150 (0.7%)         | 1/40 (2.5%)     | 0/26 (0.0%)       | 0/7 (0.0%)               | 2/223 (0.9%)                           | 3/246 (1.2%)             | 1/92 (1.1%)                                    |
| <b>Cephalosporins 1st generation</b> |                                     |                      |                 |                   |                          |                                        |                          |                                                |
| Cephalexin                           | 8/324 (2.5%)                        | 5/150 (3.3%)         | 1/40 (2.5%)     | 0/26 (0.0%)       | 0/7 (0.0%)               | 6/223 (2.7%)                           | 3/246 (1.2%)             | 2/92 (2.2%)                                    |
| <b>Cephalosporins 2nd generation</b> |                                     |                      |                 |                   |                          |                                        |                          |                                                |
| Cefuroxime                           | 4/324 (1.2%)                        | 2/150 (1.3%)         | 1/40 (2.5%)     | 0/26 (0.0%)       | 0/7 (0.0%)               | 3/223 (1.3%)                           | 2/246 (0.8%)             | 1/92 (1.1%)                                    |
| <b>Cephalosporins 3rd generation</b> |                                     |                      |                 |                   |                          |                                        |                          |                                                |
| Ceftriaxone                          | 123/324 (38.0%)                     | 48/150 (32.0%)       | 18/40 (45.0%)   | 14/26 (53.8%)     | 4/7 (57.1%)              | 84/223 (37.7%)                         | 90/246 (36.6%)           | 31/92 (33.7%)                                  |
| Ceftazidime                          | 1/324 (0.3%)                        | 0/150 (0.0%)         | 0/40 (0.0%)     | 0/26 (0.0%)       | 0/7 (0.0%)               | 0/223 (0.0%)                           | 1/246 (0.4%)             | 1/92 (1.1%)                                    |
| Cefotaxime                           | 1/324 (0.3%)                        | 1/150 (0.7%)         | 0/40 (0.0%)     | 0/26 (0.0%)       | 0/7 (0.0%)               | 1/223 (0.4%)                           | 1/246 (0.4%)             | 0/92 (0.0%)                                    |
| <b>Macrolides</b>                    |                                     |                      |                 |                   |                          |                                        |                          |                                                |
| Azithromycin                         | 207/324 (63.9%)                     | 111/150 (74.0%)      | 19/40 (47.5%)   | 15/26 (57.7%)     | 2/7 (28.6%)              | 147/223 (65.9%)                        | 162/246 (65.9%)          | 58/92 (63.0%)                                  |
| <b>Other antibiotics</b>             |                                     |                      |                 |                   |                          |                                        |                          |                                                |
| Gentamicin                           | 5/324 (1.5%)                        | 3/150 (2.0%)         | 1/40 (2.5%)     | 0/26 (0.0%)       | 0/7 (0.0%)               | 4/223 (1.8%)                           | 2/246 (0.8%)             | 1/92 (1.1%)                                    |
| Metronidazole                        | 6/324 (1.9%)                        | 2/150 (1.3%)         | 0/40 (0.0%)     | 0/26 (0.0%)       | 0/7 (0.0%)               | 2/223 (0.9%)                           | 5/246 (2.0%)             | 4/92 (4.3%)                                    |
| Trimethoprim/<br>sulfamethoxazole    | 1/324 (0.3%)                        | 0/150 (0.0%)         | 0/40 (0.0%)     | 1/26 (3.8%)       | 0/7 (0.0%)               | 1/223 (0.4%)                           | 1/246 (0.4%)             | 0/92 (0.0%)                                    |
| Vancomycin                           | 1/324 (0.3%)                        | 1/150 (0.7%)         | 0/40 (0.0%)     | 0/26 (0.0%)       | 0/7 (0.0%)               | 1/223 (0.4%)                           | 0/246 (0.0%)             | 0/92 (0.0%)                                    |
| <b>Unknown<sup>¥</sup></b>           | 11/324 (3.4%)                       | 7/150 (4.7%)         | 1/40 (2.5%)     | 0/26 (0.0%)       | 0/7 (0.0%)               | 8/223 (3.6%)                           | 7/246 (2.8%)             | 3/92 (3.3%)                                    |

\*Mixed infections in stool culture, n=5 *Campylobacter* and *Salmonella*, n=2 *Campylobacter* and *Shigella*.

§ Some children received more than one antibiotic agent; therefore, the percentages exceed 100%. ¥ Antibiotic treatment documented without specifying the particular agent used.

AGE= Acute gastroenteritis.

**Table S4: Antibiotic treatment in children with culture-proven bacterial AGE or dysentery with other bacterial infection (N=32).**

|                                      | <b>Culture proven AGE or dysentery with bacterial co-infection</b> |
|--------------------------------------|--------------------------------------------------------------------|
| <b>Total</b>                         | <b>N (%)</b>                                                       |
|                                      | 32 (100%)                                                          |
| <b>Received antibiotics</b>          |                                                                    |
| <b>Yes</b>                           | 31 (96.9%)                                                         |
| <b>No</b>                            | 1 (3.1%)                                                           |
| <b>Antibiotic agents<sup>§</sup></b> |                                                                    |
| <b>Penicillin</b>                    |                                                                    |
| Ampicillin                           | 1 (3.2%)                                                           |
| Amoxicillin                          | 12 (38.7%)                                                         |
| Amoxicillin/ clavulanic acid         | 1 (3.2%)                                                           |
| <b>Cephalosporins 1st generation</b> |                                                                    |
| Cephalexin                           | 3 (9.7%)                                                           |
| Cefamezin                            | 3 (9.7%)                                                           |
| <b>Cephalosporins 2nd generation</b> |                                                                    |
| Cefuroxime                           | 6 (19.4%)                                                          |
| <b>Cephalosporins 3rd generation</b> |                                                                    |
| Ceftriaxone                          | 13 (41.9%)                                                         |
| <b>Macrolides</b>                    |                                                                    |
| Azithromycin                         | 7 (22.6%)                                                          |
| <b>Unknown*</b>                      | 4 (12.9%)                                                          |

<sup>§</sup> Some children received more than one antibiotic agent; therefore, the percentages exceed 100%. \* Antibiotic treatment documented without specifying the particular agent used. AGE= acute gastroenteritis.

**Table S5: Antibiotic treatment in hospitalized children with AGE and bacterial co-infection**

| <b>Total</b>                         | <b>N=251</b> | <b>%</b> |
|--------------------------------------|--------------|----------|
| <b>Received antibiotics</b>          |              |          |
| Yes                                  | 236          | 94.0%    |
| No                                   | 15           | 6.0%     |
| <b>Antibiotic agents<sup>§</sup></b> |              |          |
| <b>Penicillin</b>                    |              |          |
| Ampicillin                           | 13           | 5.5%     |
| Amoxicillin                          | 138          | 58.5%    |
| Penicillin V                         | 1            | 0.4%     |
| Penicillin                           | 1            | 0.4%     |
| Amoxicillin/ clavulanic acid         | 36           | 15.3%    |
| Piperacillin/ tazobactam             | 1            | 0.4%     |
| <b>Cephalosporins 1st generation</b> |              |          |
| Cephalexin                           | 19           | 8.1%     |
| Cefamezin                            | 9            | 3.8%     |
| <b>Cephalosporins 2nd generation</b> |              |          |
| Cefuroxime                           | 47           | 19.9%    |
| <b>Cephalosporins 3rd generation</b> |              |          |
| Ceftriaxone                          | 80           | 33.9%    |
| <b>Macrolides</b>                    |              |          |
| Azithromycin                         | 21           | 8.9%     |
| <b>Other antibiotics<sup>*</sup></b> | 19           | 8.1%     |
| <b>Unknown<sup>‡</sup></b>           | 21           | 8.9%     |

<sup>§</sup> Some children received more than one antibiotic agent; therefore, the percentages exceed 100%.

<sup>\*</sup>Amikacin (N=1), Clindamycin (N=3), Gentamicin (N=12), Metronidazole (N=1),

Trimethoprim/sulfamethoxazole (N=2). <sup>‡</sup> Antibiotic treatment documented without specifying the particular agent used. AGE= acute gastroenteritis.

**Table S6: Bacterial co-infections with AGE**

|                                          | <b>N</b> | <b>%</b> |
|------------------------------------------|----------|----------|
| <b>Bacterial co-infections with AGE*</b> | 251      | 100.0%   |
| Pneumonia                                | 76       | 30.3%    |
| Bacteremia                               | 11       | 4.4%     |
| Urinary tract infection                  | 55       | 21.9%    |
| Tonsilitis                               | 10       | 4.0%     |
| Otitis media                             | 93       | 37.1%    |
| Lymphadenitis                            | 4        | 1.6%     |
| Impetigo                                 | 2        | 0.8%     |
| Cellulitis                               | 6        | 2.4%     |
| Osteomyelitis                            | 2        | 0.8%     |
| Mastoiditis                              | 1        | 0.4%     |

\*Children with AGE could have one bacterial infection or more therefore, the percentage exceeds 100%.

AGE= Acute gastroenteritis.
